# Supplementary material for: Why do patients go off track? Examining potential influencing factors for being at risk of psychotherapy treatment failure
Source: Springer Nature journal article supplement (doi:10.1007/s11136-020-02664-6), 2020-10-21
Supplement: MOESM1 [file 18509854]

**Reference:**

Schilling, V. N. L. S., Zimmermann, D., Rubel, J. A., Boyle, K. S., & Lutz, W. (2020). Why do patients go off track? Examining potential influencing factors for being at risk of psychotherapy treatment failure. *Quality of Life Research*.

**Table ES1: Domains and item cut-offs used within the TTN**

| <b>CST domains</b>                 | <b>Instruments</b>               | <b>Domain cut-off: if cut-off is crossed, domain is flagged orange and the therapist is granted access to the corresponding CST domain</b> | <b>Item cut-off: Within the CST domain, critical items (i.e., the patient surpassed the item cut-off) are marked in red, to shed light on the problematic aspects, while non-critical items appear in white</b> |
|------------------------------------|----------------------------------|--------------------------------------------------------------------------------------------------------------------------------------------|-----------------------------------------------------------------------------------------------------------------------------------------------------------------------------------------------------------------|
| Risk/suicidality                   | Items from the HSCL-11 and OQ-30 | As soon as any of the items' cut-offs are crossed                                                                                          | HSCL-suicidality: $\geq 2$<br>OQ-suicidality and OQ-risk: $\leq 3$                                                                                                                                              |
| Therapeutic alliance               | ASC therapeutic alliance         | Subscale total $\leq 39$                                                                                                                   | $\leq 2$                                                                                                                                                                                                        |
| Therapy motivation                 | ASC motivation                   | Subscale total $\leq 32$                                                                                                                   | $\leq 2$                                                                                                                                                                                                        |
| Social support                     | ASC social support               | Subscale total $\leq 23$                                                                                                                   | $\leq 2$                                                                                                                                                                                                        |
| Critical life events               | ASC life events                  | Subscale total $\leq 23$                                                                                                                   | $\leq 2$                                                                                                                                                                                                        |
| Emotion regulation/self-regulation | ASQ                              | Subscale total adjusting $\leq 1.70$<br><br>Subscale total tolerating $\leq 2.29$<br><br>Subscale total concealing $\leq 2.27$             | adjusting: $\leq 2$<br><br>tolerating: $\leq 2$<br><br>concealing: $\leq 2$                                                                                                                                     |

Note: ASC = Assessment for Signal Clients; ASQ = Affective Style Questionnaire; HSCL = Hopkins Symptom Checklist; OQ = Outcome Questionnaire. ASC-therapeutic alliance: items #1- #11; ASC-social support: items #12- #22; ASC-motivation: items # 23- #31; ASC-life events: items #32-#40; ASQ-concealing: items #1, #2, #5, #9, #10, #13, #15, #18, #20; ASQ-tolerating: items #3, #6, #8, #11, #14, #17; ASQ-adjusting: items #4, #7, #12, #16, #19; HSCL-suicidality: item #10; OQ-suicidality: item #05; OQ-risk: item #18. The following items were recoded: ASC: #6 - #8, #22 - #29, #31 - #40; ASQ: subscale concealing (#1, #2, #5, #9, #10, #13, #15, #18, #20).

**Figure ES1:** The different components of the TTN

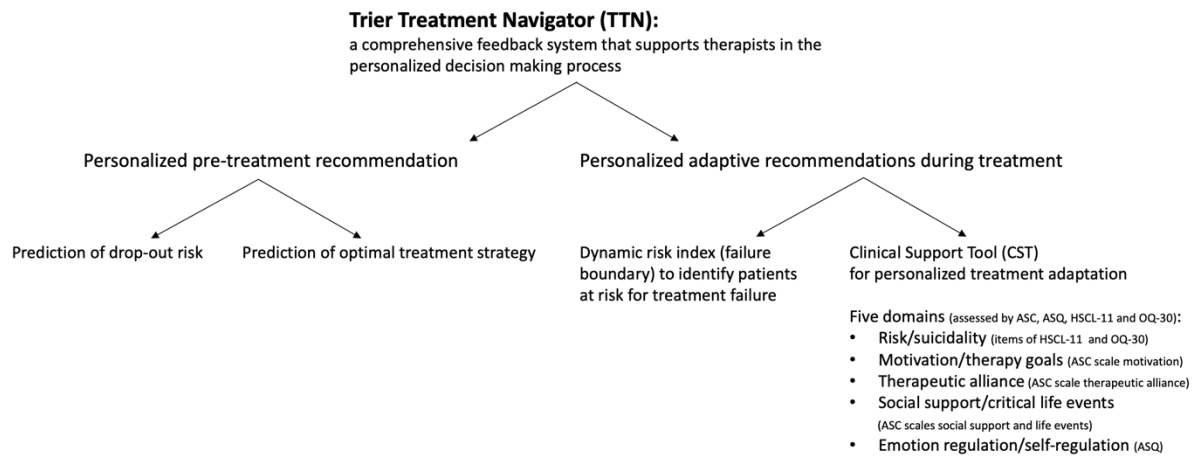

**Table ES2:** Independent samples t-test comparing the mean scores of on-track patients and not-on-track patients (at session 6) regarding the individual items and percentage of surpassing the item cut-off by patient type at session 6.

| Item                                                                      | OT   |           | NOT  |           | <i>t</i> | <i>p</i>        | Percentage of crossings |      |
|---------------------------------------------------------------------------|------|-----------|------|-----------|----------|-----------------|-------------------------|------|
|                                                                           | Mean | <i>SD</i> | Mean | <i>SD</i> |          |                 | OT                      | NOT  |
| <b>ASQ</b>                                                                |      |           |      |           |          |                 |                         |      |
| 01. People usually can't tell how I am feeling inside.                    | 2.80 | 1.08      | 2.74 | 1.15      | 0.55     | .584            | 44.0                    | 40.7 |
| 02. I have my emotions well under control                                 | 2.87 | 0.98      | 3.11 | 1.06      | -2.19    | <b>.030</b>     | 33.7                    | 28.6 |
| 03. I can tolerate having strong emotions.                                | 2.95 | 0.99      | 2.76 | 1.09      | 1.64     | .102            | 30.8                    | 35.7 |
| 04. I can avoid getting upset by taking a different perspective on things | 2.70 | 1.08      | 2.60 | 1.01      | 0.95     | .342            | 41.0                    | 48.6 |
| 05. I often suppress my emotional reactions to things.                    | 2.91 | 1.12      | 2.76 | 1.16      | 1.26     | .208            | 35.5                    | 41.4 |
| 06. It's ok if people see me being upset.                                 | 2.73 | 1.05      | 2.50 | 1.07      | 1.98     | <b>.049</b>     | 40.7                    | 47.9 |
| 07. I can calm down very quickly                                          | 2.70 | 1.07      | 2.51 | 1.03      | 1.66     | .098            | 38.8                    | 43.6 |
| 08. I am able to let go of my feelings                                    | 2.64 | 1.08      | 2.70 | 1.16      | -0.51    | .608            | 44.7                    | 45.0 |
| 09. I am good at hiding my feelings.                                      | 2.77 | 1.19      | 2.89 | 3.26      | -0.90    | .367            | 43.6                    | 34.3 |
| 10. People usually can't tell when I am upset.                            | 3.26 | 1.14      | 3.22 | 1.15      | 0.36     | .720            | 24.2                    | 22.1 |
| 11 It's ok to feel negative emotions at times                             | 3.37 | 1.03      | 3.28 | 1.07      | 0.83     | .410            | 18.3                    | 23.6 |
| 12. I can get out of a bad mood very quickly.                             | 2.50 | 1.08      | 2.10 | 1.04      | 3.54     | <b>&lt;.001</b> | 45.1                    | 59.3 |
| 13. People usually can't tell when I am sad.                              | 2.98 | 1.18      | 3.02 | 1.16      | -0.31    | .759            | 35.5                    | 30.7 |
| 14. I can tolerate being upset.                                           | 3.09 | 1.02      | 2.87 | 1.04      | 1.97     | <b>.050</b>     | 25.3                    | 33.6 |
| 15. I can act in a way that people don't see me being upset               | 2.99 | 1.16      | 2.95 | 1.22      | 0.35     | .724            | 34.4                    | 35.0 |
| 16. I know exactly what to do to get myself into a better mood.           | 2.57 | 1.02      | 2.37 | 0.93      | 1.95     | .052            | 46.5                    | 57.1 |
| 17. There is nothing wrong with feeling very emotional                    | 3.30 | 1.00      | 3.10 | 1.16      | 1.69     | .093            | 19.8                    | 27.1 |
| 18. I could easily fake emotions.                                         | 3.61 | 1.89      | 3.70 | 1.14      | -0.73    | .456            | 19.4                    | 14.3 |
| 19. I can get into a better mood quite easily.                            | 2.38 | 1.02      | 2.08 | 0.97      | 2.84     | <b>.005</b>     | 53.5                    | 64.3 |
| 20. I can hide my anger well if I have to.                                | 2.85 | 1.18      | 2.93 | 1.25      | -0.62    | .535            | 41.0                    | 36.4 |
| <b>ASC</b>                                                                |      |           |      |           |          |                 |                         |      |
| 01. I felt cared for and respected as a person.                           | 4.46 | 0.70      | 4.39 | 0.84      | 0.73     | .466            | 1.5                     | 3.6  |
| 02. I felt my therapist understood me.                                    | 4.46 | 0.62      | 4.43 | 0.73      | 0.40     | .687            | 0.4                     | 0.7  |
| 03. I thought the suggestions my therapist made were useful.              | 4.05 | 0.84      | 4.08 | 0.91      | -0.32    | .748            | 1.1                     | 2.1  |
| 04. I felt like I could trust my therapist completely.                    | 4.45 | 0.73      | 4.23 | 0.78      | 2.69     | <b>.008</b>     | 0.7                     | 1.4  |
| 05. I was willing to share my innermost thoughts with my therapist.       | 4.11 | 0.90      | 4.10 | 0.86      | 0.09     | .932            | 4.4                     | 5.0  |

|                                                                                                                                             |      |      |      |      |       |                 |      |      |
|---------------------------------------------------------------------------------------------------------------------------------------------|------|------|------|------|-------|-----------------|------|------|
| 06. I felt there was a breakdown in the relationship with my therapist.                                                                     | 4.89 | 0.42 | 4.88 | 0.49 | 0.21  | .834            | 0.4  | 0.7  |
| 07. I felt like my therapist disapproved of me.                                                                                             | 4.90 | 0.48 | 4.90 | 0.48 | 0.07  | .946            | 1.1  | 0.7  |
| 08. At times, the tone of my therapist's voice seemed critical or impatient.                                                                | 4.89 | 0.46 | 4.82 | 0.62 | 1.24  | .215            | 0.7  | 1.4  |
| 09. My therapist seemed to be glad to see me.                                                                                               | 3.88 | 0.81 | 3.84 | 0.83 | 0.46  | .643            | 1.1  | 2.1  |
| 10. My therapist and I seemed to work well together to accomplish what I want.                                                              | 4.28 | 0.66 | 4.20 | 0.73 | 0.97  | .332            | 0.0  | 0.7  |
| 11. My therapist and I had a similar understanding of my problems.                                                                          | 3.99 | 0.73 | 3.92 | 0.83 | 0.80  | .426            | 1.5  | 0.7  |
| 12. I could count on my friendships when things went wrong.                                                                                 | 3.56 | 1.19 | 3.21 | 1.27 | 2.63  | <b>.009</b>     | 15.8 | 27.1 |
| 13. I could talk about problems with my friends.                                                                                            | 3.27 | 1.27 | 3.18 | 1.37 | 0.61  | .544            | 24.5 | 30.0 |
| 14. I could talk about problems with my family.                                                                                             | 3.17 | 1.33 | 2.91 | 1.33 | 1.82  | .070            | 30.4 | 39.3 |
| 15. I got the emotional help and support I needed from someone in my family.                                                                | 3.10 | 1.37 | 2.92 | 1.41 | 1.15  | .253            | 30.0 | 37.9 |
| 16. There was a special person who was around when I was in need.                                                                           | 3.92 | 1.27 | 3.53 | 1.33 | 2.78  | <b>.006</b>     | 15.4 | 22.9 |
| 17. There was a special person with whom I could share my joys and sorrows.                                                                 | 3.80 | 1.28 | 3.56 | 1.30 | 1.70  | .091            | 15.8 | 22.1 |
| 18. I could get material support if needed (like: money, food, transportation, child care, tools, repairs, health care, legal advice, etc.) | 3.03 | 1.43 | 3.00 | 1.56 | 0.21  | .832            | 29.3 | 32.9 |
| 19. I had support from social groups (like: church, school, AA, clubs, etc.)                                                                | 1.86 | 1.23 | 1.84 | 1.28 | 0.16  | .875            | 64.1 | 65.0 |
| 20. I felt accepted by someone other than my therapist.                                                                                     | 4.00 | 1.05 | 3.85 | 1.15 | 1.26  | .209            | 7.0  | 12.1 |
| 21. I felt connected to a higher power.                                                                                                     | 1.41 | 0.89 | 1.57 | 1.06 | -1.49 | .139            | 82.1 | 76.4 |
| 22. Some subjects were so sensitive I couldn't talk with anyone about them.                                                                 | 3.69 | 1.35 | 3.25 | 1.38 | 2.97  | <b>.003</b>     | 19.4 | 29.3 |
| 23. I wonder what I am doing in therapy; actually I find it boring.                                                                         | 4.83 | 0.44 | 4.82 | 0.54 | 0.34  | .734            | 0.4  | 1.4  |
| 24. Honestly, I really don't understand what I can get from therapy.                                                                        | 4.79 | 0.57 | 4.76 | 0.63 | 0.42  | .674            | 1.1  | 1.4  |
| 25. I am not really sure what to work on in therapy.                                                                                        | 4.16 | 1.18 | 4.21 | 1.11 | -0.43 | .670            | 13.2 | 11.4 |
| 26. I had thoughts about quitting therapy; it's just not for me.                                                                            | 4.86 | 0.47 | 4.90 | 0.41 | -0.84 | .401            | 0.7  | 0.7  |
| 27. I don't think therapy will help me feel any better.                                                                                     | 4.59 | 0.84 | 4.48 | 0.88 | 1.20  | .233            | 3.7  | 4.3  |
| 28. I have no desire to work out my problems.                                                                                               | 4.89 | 0.38 | 4.83 | 0.60 | 1.18  | .238            | 0.4  | 2.9  |
| 29. Although I am currently unhappy with life, there is nothing I can do about it now.                                                      | 4.36 | 0.99 | 4.19 | 1.06 | 1.55  | .123            | 7.0  | 7.1  |
| 30. Through therapy I am taking more responsibility for changing my life.                                                                   | 3.98 | 0.95 | 4.06 | 0.97 | -0.74 | .461            | 6.2  | 5.0  |
| 31. I am in therapy because someone is requiring it of me.                                                                                  | 4.76 | 0.71 | 4.78 | 0.75 | -0.30 | .763            | 2.9  | 2.9  |
| 32. I had an interaction with another person that I found upsetting.                                                                        | 3.33 | 1.51 | 3.02 | 1.47 | 1.20  | <b>.047</b>     | 37.0 | 40.7 |
| 33. I felt rejected or betrayed by someone.                                                                                                 | 3.81 | 1.39 | 3.18 | 1.48 | 4.06  | <b>&lt;.001</b> | 20.9 | 37.1 |
| 34. I made a mistake that I can't undo.                                                                                                     | 4.53 | 0.93 | 4.23 | 1.25 | 2.43  | <b>.016</b>     | 4.8  | 13.6 |
| 35. I received bad news that was difficult for me.                                                                                          | 3.94 | 1.40 | 3.60 | 1.50 | 2.20  | <b>.028</b>     | 21.6 | 27.1 |
| 36. I lost a person I was close to.                                                                                                         | 4.77 | 0.78 | 4.56 | 1.04 | 1.95  | .052            | 3.7  | 7.9  |
| 37. There was trouble at home, work, or school.                                                                                             | 4.05 | 1.26 | 3.49 | 1.46 | 3.73  | <b>&lt;.001</b> | 14.7 | 32.1 |

|                                                                                           |      |      |      |      |       |                 |      |      |
|-------------------------------------------------------------------------------------------|------|------|------|------|-------|-----------------|------|------|
| 38. I had health problems (such as physical pain).                                        | 3.40 | 1.56 | 2.73 | 1.48 | 4.18  | <b>&lt;.001</b> | 35.9 | 50.0 |
| 39. I shrank from facing a crisis or difficulty.                                          | 3.79 | 1.24 | 3.29 | 1.24 | 3.79  | <b>&lt;.001</b> | 19.0 | 28.6 |
| 40. I had difficulty adjusting to an occurrence in my life.                               | 3.67 | 1.32 | 3.08 | 1.40 | 3.97  | <b>&lt;.001</b> | 19.0 | 36.4 |
| <b>OQ-30</b>                                                                              |      |      |      |      |       |                 |      |      |
| 05. I have thoughts of ending my life.                                                    | 0.36 | 0.81 | 0.65 | 0.96 | -3.03 | <b>.003</b>     | 4.4  | 5.0  |
| 18. I feel annoyed by people who criticize my drinking (or drug use).                     | 0.17 | 0.53 | 0.18 | 0.56 | -1.07 | .915            | 1.5  | 1.4  |
| <b>HSCL-11</b>                                                                            |      |      |      |      |       |                 |      |      |
| 10. In the past seven days, how much were you distressed by thoughts of ending your life. | 1.33 | 0.62 | 1.49 | 0.72 | -2.25 | <b>.025</b>     | 24.9 | 36.4 |

Note:  $n = 413$ ; significant results ( $p < .05$ ) are marked in bold; Abbreviations: ASC = Assessment for Signal Clients (high values indicate high functioning); ASQ = Affective Style Questionnaire (high values indicate high functioning); HSCL = Hopkins Symptom Checklist (low values indicate low suicidality); NOT = not-on-track; OT = on-track; OQ = Outcome Questionnaire (low values indicate low suicidality/risk).
